# Supplementary material for: Transcriptome analysis reveals a complex interplay between resistance and effector genes during the compatible lentil-Colletotrichum lentis interaction
Source: PubMed Central journal article supplement (PMC5301223; doi:10.1038/srep42338), 2017-02-10
Supplement: srep42338-s1.pdf [file srep42338-s1.pdf]

**Transcriptome analysis reveals a complex interplay between  
resistance and effector genes during the compatible lentil-  
*Colletotrichum lentis* interaction**

Vijai Bhaduria<sup>1,2</sup>, Perumal Vijayan<sup>1</sup>, Yangdou Wei<sup>3</sup> & Sabine Banniza<sup>1\*</sup>

<sup>1</sup>Crop Development Centre/Department of Plant Sciences, University of Saskatchewan,  
Saskatoon, Canada

<sup>2</sup>Current address: Semiarid Prairie Agricultural Research Centre, Agriculture and Agri-  
Food Canada, Swift Current, Canada

<sup>3</sup>Department of Biology, University of Saskatchewan, Saskatoon, Canada

\*Correspondence and requests for materials should be addressed to SB (email:  
sabine.banniza@usask.ca)

**Suppl. Table 1.** Detailed gene ontology (level 2) term descriptions of *Colletotrichum lentis* (isolate CT-30 / race 0) unigenes.

| <b>GO-id</b> | <b>GO-term (Biological processes)</b>              | <b>Seqs</b> |
|--------------|----------------------------------------------------|-------------|
| GO:0008152   | metabolic process                                  | 712         |
| GO:0009987   | cellular process                                   | 609         |
| GO:0044699   | single-organism process                            | 539         |
| GO:0071840   | cellular component organization or biogenesis      | 228         |
| GO:0051179   | localization                                       | 208         |
| GO:0065007   | biological regulation                              | 170         |
| GO:0050896   | response to stimulus                               | 101         |
| GO:0032502   | developmental process                              | 44          |
| GO:0023052   | signaling                                          | 36          |
| GO:0000003   | reproduction                                       | 29          |
| GO:0032501   | multicellular organismal process                   | 28          |
| GO:0051704   | multi-organism process                             | 21          |
| GO:0022414   | reproductive process                               | 17          |
| GO:0040007   | growth                                             | 11          |
| GO:0022610   | biological adhesion                                | 1           |
| GO:0040011   | locomotion                                         | 1           |
| <b>GO-id</b> | <b>GO-term (Molecular functions)</b>               | <b>Seqs</b> |
| GO:0003824   | catalytic activity                                 | 536         |
| GO:0005488   | binding                                            | 422         |
| GO:0005215   | transporter activity                               | 86          |
| GO:0005198   | structural molecule activity                       | 60          |
| GO:0001071   | nucleic acid binding transcription factor activity | 23          |
| GO:0098772   | molecular function regulator                       | 18          |
| GO:0009055   | electron carrier activity                          | 6           |
| GO:0016209   | antioxidant activity                               | 6           |
| GO:0060089   | molecular transducer activity                      | 5           |
| GO:0000988   | protein binding transcription factor activity      | 5           |
| GO:0031386   | protein tag                                        | 4           |
| GO:0045182   | translation regulator activity                     | 1           |
| <b>GO-id</b> | <b>GO-term (Cellular components)</b>               | <b>Seqs</b> |
| GO:0005623   | cell                                               | 562         |
| GO:0043226   | organelle                                          | 483         |
| GO:0032991   | macromolecular complex                             | 280         |
| GO:0016020   | membrane                                           | 236         |
| GO:0031974   | membrane-enclosed lumen                            | 94          |
| GO:0005576   | extracellular region                               | 17          |
| GO:0009295   | nucleoid                                           | 8           |
| GO:0019012   | virion                                             | 6           |



**Suppl. Table 2.** Detailed gene ontology (level 2) term descriptions of *Lens culinaris* cultivar Eston unigenes.

| <b>GO-id</b> | <b>GO-term (Biological processes)</b>              | <b>Seqs</b> |
|--------------|----------------------------------------------------|-------------|
| GO:0008152   | metabolic process                                  | 450         |
| GO:0009987   | cellular process                                   | 342         |
| GO:0044699   | single-organism process                            | 277         |
| GO:0050896   | response to stimulus                               | 151         |
| GO:0065007   | biological regulation                              | 109         |
| GO:0051179   | localization                                       | 100         |
| GO:0071840   | cellular component organization or biogenesis      | 61          |
| GO:0023052   | signaling                                          | 33          |
| GO:0032502   | developmental process                              | 31          |
| GO:0051704   | multi-organism process                             | 27          |
| GO:0032501   | multicellular organismal process                   | 26          |
| GO:0022414   | reproductive process                               | 17          |
| GO:0002376   | immune system process                              | 16          |
| GO:0040007   | growth                                             | 11          |
| GO:0040011   | locomotion                                         | 3           |
| GO:0000003   | reproduction                                       | 1           |
| <b>GO-id</b> | <b>GO-term (Molecular functions)</b>               | <b>Seqs</b> |
| GO:0003824   | catalytic activity                                 | 330         |
| GO:0005488   | binding                                            | 322         |
| GO:0005215   | transporter activity                               | 35          |
| GO:0005198   | structural molecule activity                       | 28          |
| GO:0016209   | antioxidant activity                               | 14          |
| GO:0001071   | nucleic acid binding transcription factor activity | 12          |
| GO:0098772   | molecular function regulator                       | 9           |
| GO:0060089   | molecular transducer activity                      | 6           |
| GO:0009055   | electron carrier activity                          | 6           |
| GO:0045735   | nutrient reservoir activity                        | 2           |
| GO:0000988   | protein binding transcription factor activity      | 1           |
| <b>GO-id</b> | <b>GO-term (Cellular components)</b>               | <b>Seqs</b> |
| GO:0005623   | cell                                               | 265         |
| GO:0043226   | organelle                                          | 162         |
| GO:0016020   | membrane                                           | 117         |
| GO:0032991   | macromolecular complex                             | 69          |
| GO:0005576   | extracellular region                               | 34          |
| GO:0031974   | membrane-enclosed lumen                            | 19          |
| GO:0055044   | symplast                                           | 15          |
| GO:0030054   | cell junction                                      | 15          |
| GO:0031012   | extracellular matrix                               | 2           |



**Suppl. Table 3.** Primers used in the study.

| <b>Primer</b> | <b>Sequence (5'-3')</b> |
|---------------|-------------------------|
| CICE0-5_F     | TGCGGACTCAGCCTACAATC    |
| CICE0-5_R     | TACGGTGTTCGACCGATG      |
| CICE0-8_F     | TTAACGCCTGTGGCCTGTAG    |
| CICE0-8_R     | ATGCATTGTGCGAGCTGTCCA   |
| CICE0-13_F    | GCCACTACACCCAGATCGTC    |
| CICE0-13_R    | TTCTCGCCGATGAAGTTGCC    |
| CICE0-15_F    | ATCGGAATCGAATCGGCACA    |
| CICE0-15_R    | TAGTGGAAGAGGGTGGCGTA    |
| LcSnc1_F      | TTGCAGATGCCATGCTTGTT    |
| LcSnc1_R      | GTAAAGGAGGACCCACCTCA    |
| LcDirigent_F  | TCCACTTTGGGGACTTGGTAG   |
| LcDirigent_R  | GATCAGCGCCAGCAAAAGTAA   |

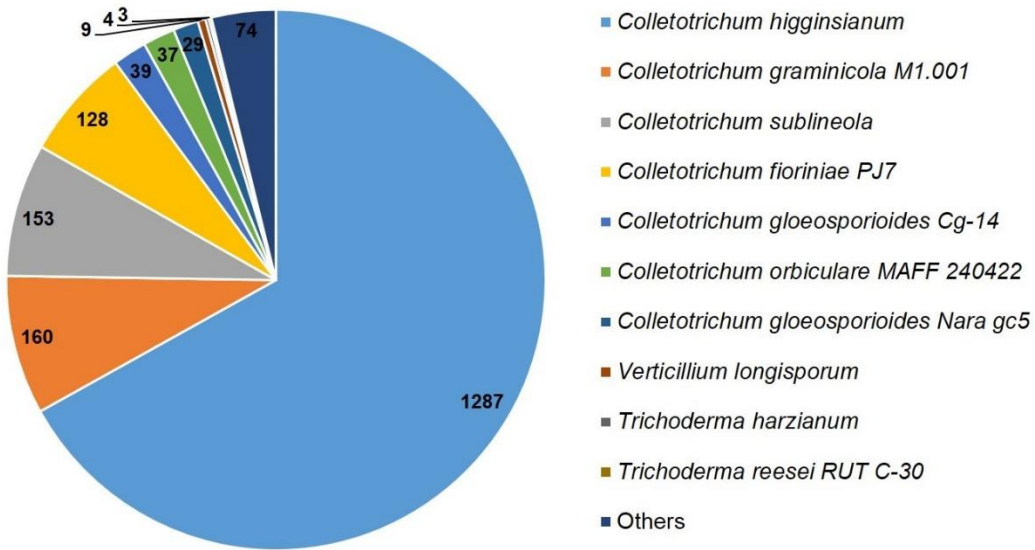

**Suppl. Fig. 1.** The top ten fungal species in blast hits classified based on species resulting from the query of *Colletotrichum lentis* unigenes against the non-redundant protein database using blastx. The number within or next to slices represent the number of unigenes.

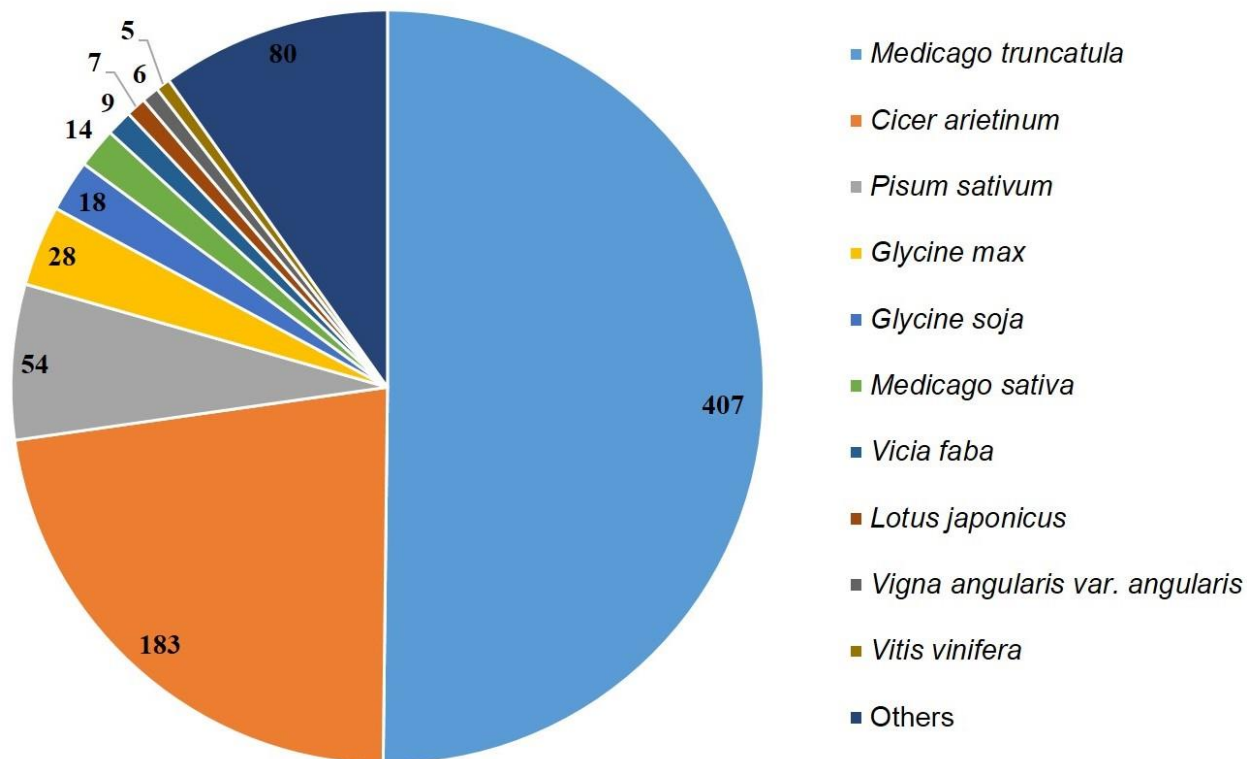

**Suppl. Fig. 2.** The top ten plant species in blast hits classified based on the species resulting from the query of *Lens culinaris* cultivar Eston unigenes against the non-redundant protein database using blastx. The number within or next to slices represent the number of unigenes.



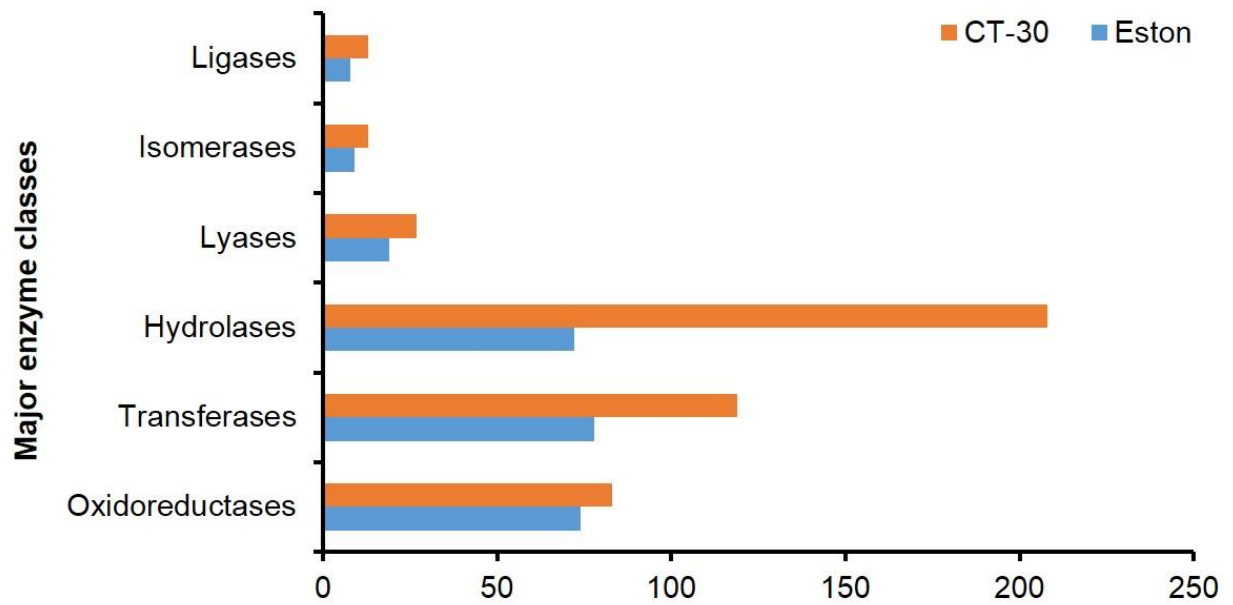

**Suppl. Fig. 3.** Comparative analysis of major enzyme classes. Proteins encoded by *Colletotrichum lentis* and *Lens culinaris* unigenes were mapped onto the KEGG pathways, and major enzyme classes were compiled as a comparative bar chart.

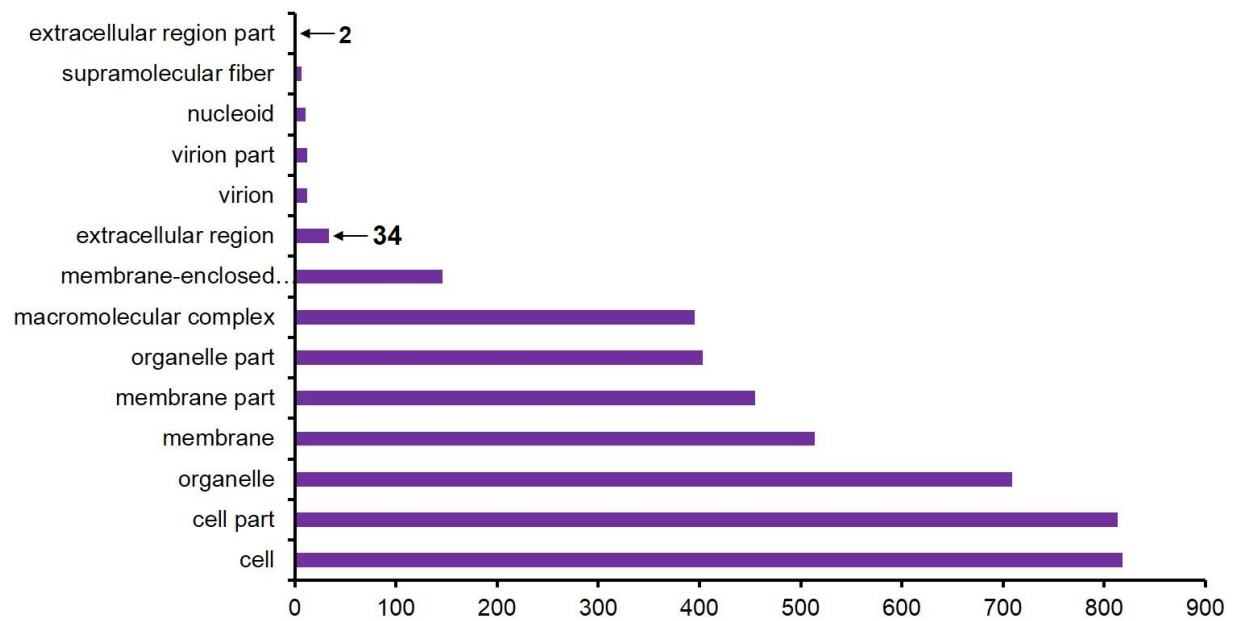

**Suppl. Fig. 4.** Cellular components derived from level 2 gene ontology (GO) descriptions. Proteins encoded by *Colletotrichum lentis* unigenes were classified based on their subcellular localization using the blast2go software.

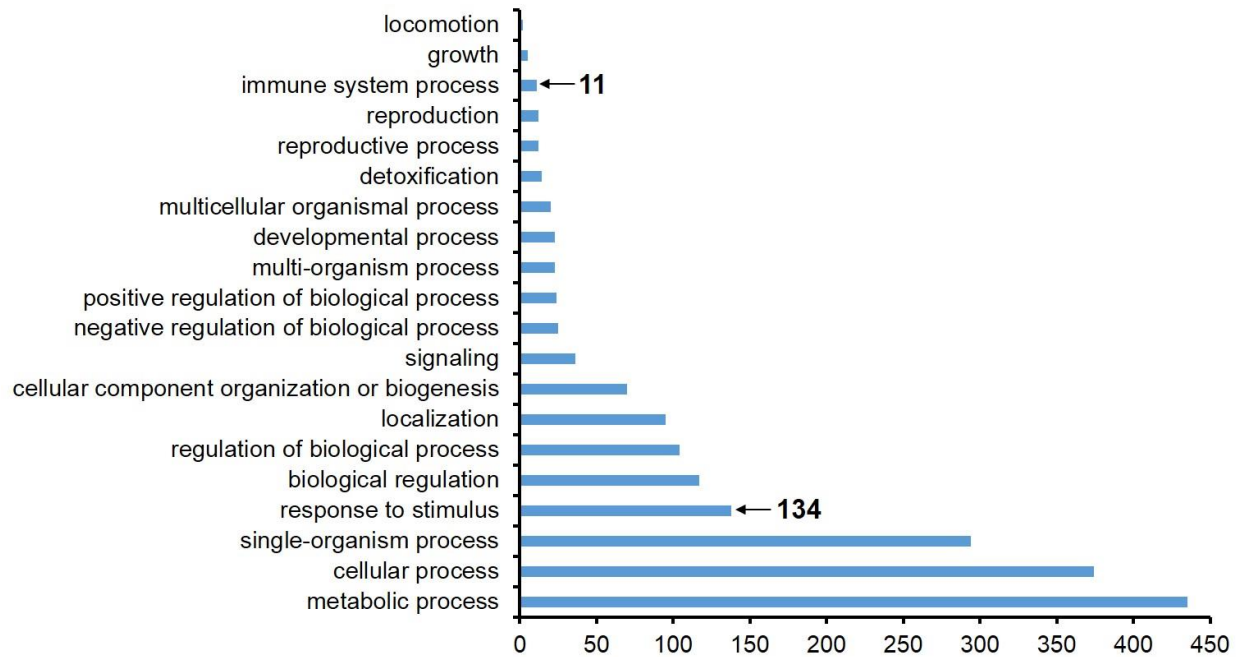

**Suppl. Fig. 5.** Biological processes derived from level 2 gene ontology descriptions. Proteins encoded by *Lens culinaris* cultivar Eston unigenes were classified based on their implication in various biological processes using the blast2go software.

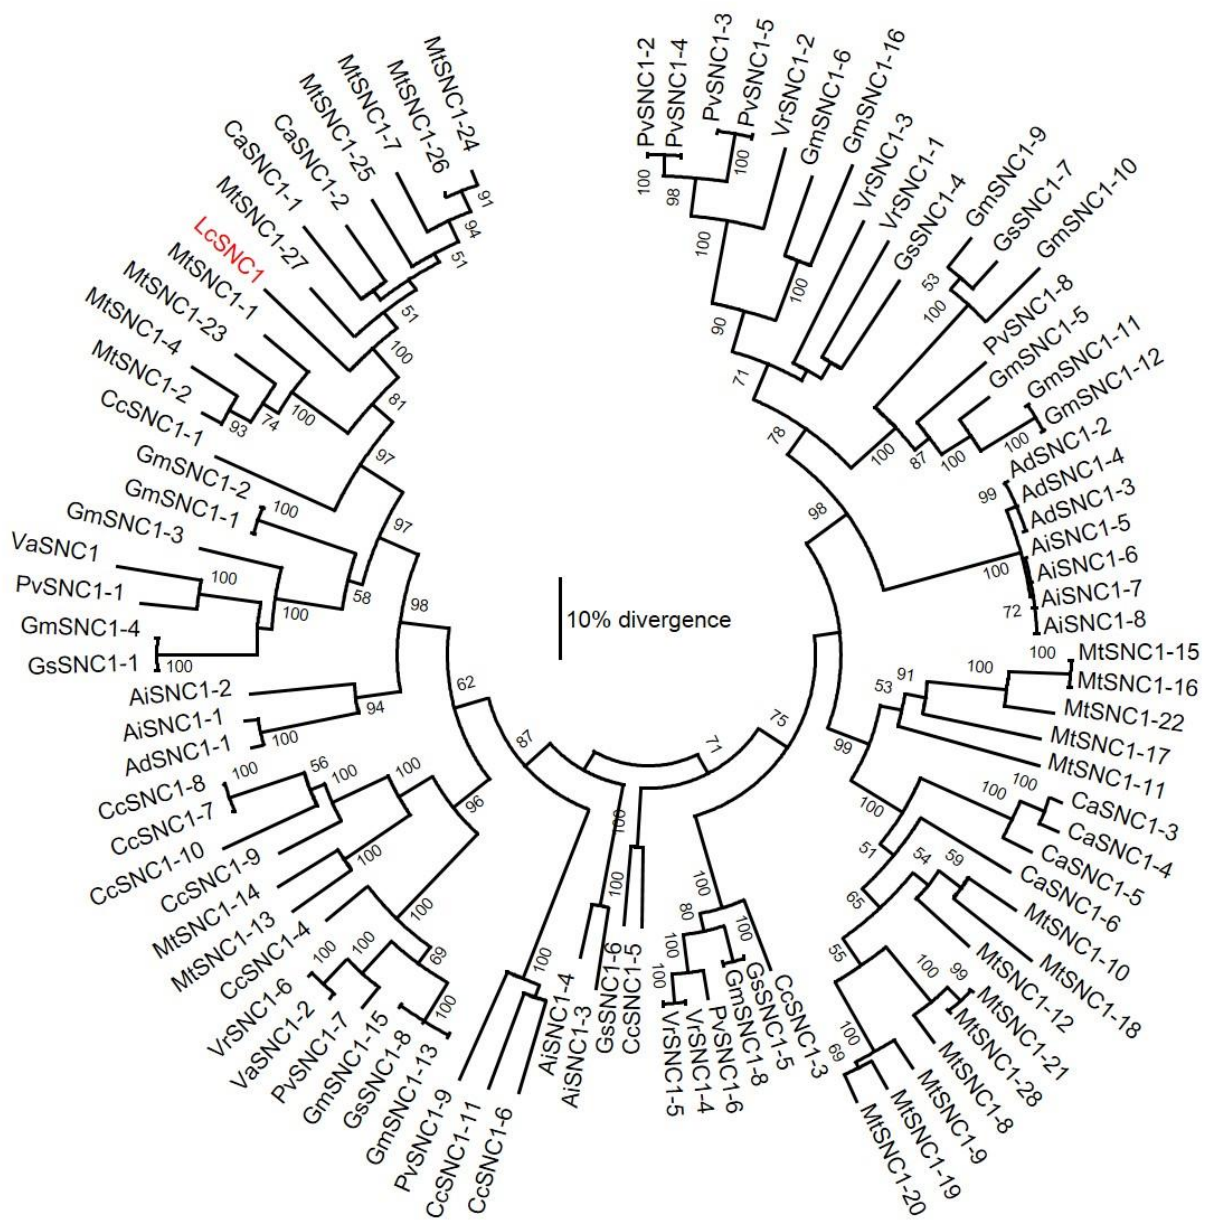

**Suppl. Fig. 6.** Phylogenetic analysis of homologs of LcSNC1 from *Lens culinaris*. An unrooted phylogenetic tree was constructed using the randomized accelerated *maximum likelihood* (RAxML) from LcSNC1 homologs derived from the non-redundant protein data available at the NCBI using *blastp* with an *e* value of  $1e-30$ . The bar indicates mean sequence divergence. The SNC1 protein is prefixed with the species name: Ps, *Pisum sativum*; Pv, *Phaseolus vulgaris*; Ca, *Cicer arietinum*, Gm, *Glycine max*; Gs, *Glycine soja*; Mt, *Medicago truncatulata*; Cc, *Cajanus cajan*; Ad, *Arachis duranensis*; Ai, *A. ipaensis*; Vr, *Vigna radiate*; and Va, *V. angularis*.

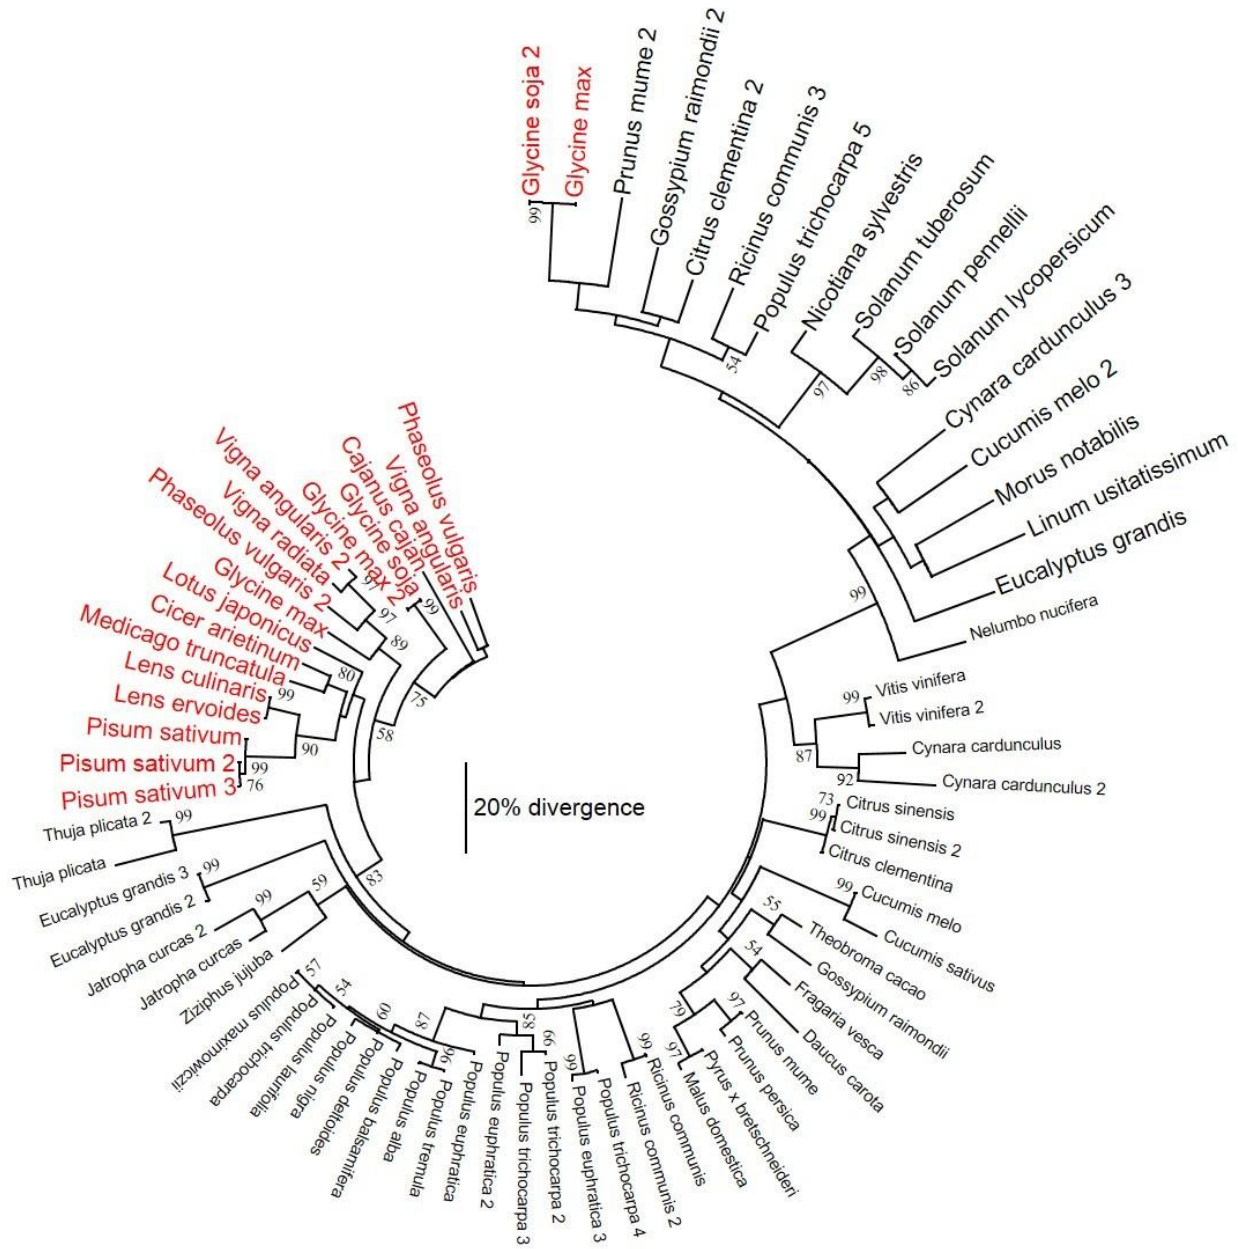

**Suppl. Fig. 7.** Phylogenetic analysis of homologs of LcDirigent from *Lens culinaris*. An unrooted phylogenetic tree was generated using the randomized accelerated maximum likelihood (RAxML) from LcDirigent homologs derived from the non-redundant protein data available at the NCBI using blastp with an e value 1e-30. The bar indicates mean sequence divergence.
